# Supplementary material for: Design of deep-ultraviolet nonlinear optical materials based on fundamental building blocks with excellent microscopic properties
Source: Royal Society of Chemistry journal article supplement (doi:10.1039/d2nj05484a), 2022-12-22
Supplement: d2nj05484a1.pdf [file d2nj05484a1.pdf]

## Electronic Supplementary Information

### Design of Deep-Ultraviolet Nonlinear Optical Materials Based on Fundamental Building Blocks with Excellent Microscopic Properties

Jie Zhang,<sup>a</sup> **Shibin Wang**,<sup>a</sup> Jianbang Chen,<sup>a</sup> Xuchu Huang<sup>a\*</sup>

<sup>a</sup> College of Physics and Material Science, Changji University, Changji 931100, China.

\*Corresponding Authors: hxuchu@163.com

## Calculations Details

The electronic and band structures as well as linear optical property calculations were performed by employing CASTEP,<sup>1</sup> a plane-wave pseudopotential DFT package, with the norm-conserving pseudopotentials (NCP).<sup>2</sup> The exchange-correlation functional was Perdew-Burke-Emzerhoff (PBE) functional within the generalized gradient approximation (GGA).<sup>3-5</sup> The plane-wave energy cutoff was set at 950.0 eV. Self-consistent field (SCF) calculations were performed with a convergence criterion of  $0.5 \times 10^{-6}$  eV/atom on the total energy. The k-point separation for each material was set as  $0.05 \text{ \AA}^{-1}$  in the Brillouin zone,<sup>6</sup> resulting in corresponding Monkhorst-Pack k-point meshes. The empty bands are set as 3 times of valence bands in the calculation to ensure the convergence of SHG coefficients. For other calculation parameters and convergence criteria, we retained the default values and used the linear response method to calculate phonon dispersion.

The calculations of the linear optical performance were described in terms of the complex dielectric constant  $\epsilon(\omega) = \epsilon_1(\omega) + i\epsilon_2(\omega)$ . The imaginary part  $\epsilon_2(\omega)$  of the dielectric function  $\epsilon(\omega)$  was calculated by using momentum matrix elements between the occupied and unoccupied electronic states:

$$\epsilon_2(\hbar\omega) = \frac{2e^2\pi}{\Omega\epsilon_0} \sum_{kcv} \left| \langle \psi_k^c | \hat{u} \cdot r | \psi_k^v \rangle \right|^2 \delta[E_k^c - E_k^v - E]$$

Here  $\Omega$  is the unit cell volume,  $v$  and  $c$  represent the valence band (VB) and conduction band (CB), respectively.  $\omega$  and  $\hat{u}$  are the frequency and the unit vector in the polarization direction of the incident light. Under the periodic boundary condition,  $\left| \langle \psi_k^c | \hat{u} \cdot r | \psi_k^v \rangle \right|$  is the transition matrix element between the VB and the CB at a specific  $k$  point in the first Brillouin zone. The real part  $\epsilon_1(\omega)$  can be obtained from the imaginary part  $\epsilon_2(\omega)$  using the Kramers–Kronig transformation. The refractive indices  $n$  and birefringence  $\Delta n$  can be obtained from the complex dielectric function.

The SHG coefficients were calculated using the so-called length-gauge formalism derived by Aversa and Sipe.<sup>7</sup> At zero frequency, the static second-order NLO susceptibilities can be ascribed to the virtual hole (VH) and virtual electron (VE) processes:<sup>8</sup>

$$\chi_{\alpha\beta\gamma}^{(2)} = \chi_{\alpha\beta\gamma}^{(2)}(\text{VE}) + \chi_{\alpha\beta\gamma}^{(2)}(\text{VH})$$

Where  $\chi_{\alpha\beta\gamma}^{(2)}(\text{VE})$  and  $\chi_{\alpha\beta\gamma}^{(2)}(\text{VH})$  are computed using the following formulas:

$$\chi_{\alpha\beta\gamma}^{(2)}(\text{VE}) = \frac{e^3}{2\hbar^2 m^3} \sum_{vcc'} \int \frac{d^3k}{4\pi^3} P(\alpha\beta\gamma) \text{Im}[p_{cv}^\alpha p_{cc'}^\beta p_{c'v}^\gamma] \times \left( \frac{1}{\omega_{cv}^3 \omega_{v'c'}^2} + \frac{2}{\omega_{vc}^4 \omega} \right)$$

$$\chi_{\alpha\beta\gamma}^{(2)}(\text{VH}) = \frac{e^3}{2\hbar^2 m^3} \sum_{v'c} \int \frac{d^3k}{4\pi^3} P(\alpha\beta\gamma) \text{Im}[p_{v'v}^\alpha p_{v'c}^\beta p_{cv}^\gamma] \times \left( \frac{1}{\omega_{cv}^3 \omega_{v'c}^2} + \frac{2}{\omega_{vc}^4 \omega} \right)$$

Here,  $\alpha$ ,  $\beta$ , and  $\gamma$  are the Cartesian components;  $v/v'$  and  $c/c'$  denote the VBs and CBs;  $P(\alpha\beta\gamma)$ ,  $\hbar\omega_{ij}$ , and  $p_{ij}^\alpha$  refer to the full permutation, band energy difference, and momentum matrix elements, respectively.

To balance the calculation efficiency and accuracy of the optical properties under a high-density k-mesh, the GGA and scissors-corrected methods were adopted. The scissors operator was set as the difference between the calculated HSE06 and GGA bandgap. The HSE06 hybrid functional was employed to calculate more accurate bandgap value using the PWmat code,<sup>9</sup> which were shown to be consistent with experimental results. The polarizability anisotropy ( $\Delta\alpha$ ) and hyperpolarizability ( $|\beta_{\max}|$ ) of  $[\text{B}_3\text{O}_7]$ ,  $[\text{B}_3\text{O}_6\text{F}]$  and  $[\text{B}_3\text{O}_6\text{F} + \text{BO}_3]$  anionic groups in molecular level are calculated using the DFT method implemented by the Gaussian09 package.

In fact, the structure of  $\text{Li}_2\text{B}_3\text{O}_5\text{F}$  is built based on the known structure  $\text{Li}_2\text{B}_3\text{O}_4\text{F}_3$ . In  $\text{Li}_2\text{B}_3\text{O}_4\text{F}_3$ , the B (1)  $\text{O}_3$  group and B (2)  $\text{O}_3\text{F}$  group in  $[\text{B}_3\text{O}_5\text{F}_3]$  form a one-dimensional  $[\text{B}_3\text{O}_5\text{F}_3]_\infty$  chain on the  $b$ - $c$  plane by sharing O atoms, and the Li atoms are located between the two chains. The one  $[\text{BO}_3]$  triangle, one  $[\text{BO}_3\text{F}]$  tetrahedra and one  $[\text{BO}_2\text{F}_2]$

tetrahedra are linked through the sharing oxygen atom to form a  $[B_3O_5F_3]$  ring, this is the basic building block of  $Li_2B_3O_4F_3$ . In  $Li_2B_3O_5F$ , the B (1)  $O_3$  group and B (2)  $O_3F$  group in  $[B_3O_5F]$  form a one-dimensional  $[B_3O_6F]_\infty$  chain on the  $b-c$  plane by sharing O atoms, and the Li atoms are located between the two chains. The two  $[BO_3]$  triangles and one  $[BO_3F]$  tetrahedra are linked through the sharing oxygen atom to form a  $[B_3O_6F]$  ring, this is the basic building block of  $Li_2B_3O_5F$ . The structure of  $Li_2B_3O_5F$  is similar to that of the known crystal  $Li_2B_3O_4F_3$ , both of which are crystallized in the  $P2_12_12_1$  space group, but with a different FBB. Substitute  $[BO_2F_2]$  group in  $[B_3O_5F_3]$  group with  $[BO_3]$  group to form  $[B_3O_6F]$  group, thus forming  $Li_2B_3O_5F$  from the known structure  $Li_2B_3O_4F_3$ .

**Table S1.** The crystallographic data of  $\text{Li}_2\text{B}_3\text{O}_5\text{F}$ , including cell parameters, fractional coordinates, bond lengths and bond valence sum (BVS).

| $\text{Li}_2\text{B}_3\text{O}_5\text{F}$ |         |         |              |             |              |
|-------------------------------------------|---------|---------|--------------|-------------|--------------|
| $P2_12_12_1$ (19)                         |         |         |              |             |              |
| Cell parameters                           |         |         |              |             |              |
| $a$ (Å)                                   | $b$ (Å) | $c$ (Å) | $\alpha$ (°) | $\beta$ (°) | $\gamma$ (°) |
| 4.750                                     | 8.790   | 12.820  | 90           | 90          | 90           |
| Fractional coordinates                    |         |         |              |             |              |
| Atoms                                     | $x$     | $y$     | $z$          |             |              |
| Li1                                       | 0.6739  | 0.6696  | 0.3799       |             |              |
| Li2                                       | 1.5955  | 0.1365  | 0.5908       |             |              |
| B1                                        | 1.0817  | 0.3012  | 0.6678       |             |              |
| B2                                        | 0.9946  | 0.5205  | 0.5485       |             |              |
| B3                                        | 1.0329  | 0.5594  | 0.7368       |             |              |
| O1                                        | 1.0150  | 0.3645  | 0.5672       |             |              |
| O2                                        | 1.0348  | 0.6183  | 0.6364       |             |              |
| O3                                        | 1.0131  | 0.4066  | 0.7533       |             |              |
| O4                                        | 1.0564  | 0.6537  | 0.8211       |             |              |
| O5                                        | 0.9550  | 0.5703  | 0.4530       |             |              |
| F1                                        | 1.3837  | 0.2730  | 0.6743       |             |              |
| Bond lengths (Å)                          |         |         |              |             |              |
| Li1-O2                                    | 1.989   | Li1-O3  | 1.969        |             |              |
| Li1-O5                                    | 1.850   | Li2-O1  | 2.062        |             |              |
| Li2-O4                                    | 2.007   | Li2-O5  | 2.018        |             |              |
| Li2-F1                                    | 1.897   | B1-O1   | 1.440        |             |              |
| B1-O3                                     | 1.472   | B1-O4   | 1.461        |             |              |
| B1-F1                                     | 1.458   | B2-O1   | 1.396        |             |              |
| B2-O2                                     | 1.420   | B2-O5   | 1.314        |             |              |
| B3-O2                                     | 1.388   | B3-O3   | 1.363        |             |              |

|       |      |       |      |    |      |
|-------|------|-------|------|----|------|
| B3-O4 |      | 1.366 |      |    |      |
| BVS   |      |       |      |    |      |
| Li1   | 0.86 | Li2   | 0.89 | B1 | 2.99 |
| B2    | 2.96 | B3    | 2.99 | O1 | 1.97 |
| O2    | 2.05 | O3    | 2.04 | O4 | 2.03 |
| O5    | 1.75 | F1    | 0.90 |    |      |

**Table S2** The calculated band gaps, birefringence and  $d_{ij}$  of  $\beta$ -BaB<sub>2</sub>O<sub>4</sub>, LiB<sub>3</sub>O<sub>5</sub>, NH<sub>4</sub>B<sub>4</sub>O<sub>6</sub>F, CsB<sub>4</sub>O<sub>6</sub>F and KH<sub>2</sub>PO<sub>4</sub> are compared with the experimental values.

| Compounds                                                     | Space group             | Band gap (eV) | Birefringence at 1064 nm | SHG coefficient (pm/V)                                  | Cutoff edge (nm) | Shortest $\lambda_{PM}$ (nm) |
|---------------------------------------------------------------|-------------------------|---------------|--------------------------|---------------------------------------------------------|------------------|------------------------------|
| $\beta$ -BaB <sub>2</sub> O <sub>4</sub> <sup>10</sup>        | <i>R3c</i>              | 6.56          | 0.1                      | $d_{22} = \pm 2.3$                                      | 189              | 205                          |
| $\beta$ -BaB <sub>2</sub> O <sub>4</sub> *                    | <i>R3c</i>              | 6.43          | 0.106                    | $d_{22} = \pm 2.0$                                      | 193              | 209                          |
| LiB <sub>3</sub> O <sub>5</sub> <sup>10,11</sup>              | <i>Pna2<sub>1</sub></i> | 7.98          | 0.040                    | $d_{31} = 0.67$<br>$d_{32} = 0.85$<br>$d_{33} = 0.04$   | 156              | 276                          |
| LiB <sub>3</sub> O <sub>5</sub> *                             | <i>Pna2<sub>1</sub></i> | 8.20          | 0.046                    | $d_{31} = 0.72$<br>$d_{32} = 0.80$<br>$d_{33} = 0.05$   | 152              | 269                          |
| NH <sub>4</sub> B <sub>4</sub> O <sub>6</sub> F <sup>12</sup> | <i>Pna2<sub>1</sub></i> | 7.95          | 0.119                    | 1.17                                                    | 156              | 158                          |
| NH <sub>4</sub> B <sub>4</sub> O <sub>6</sub> F*              | <i>Pna2<sub>1</sub></i> | 7.70          | 0.107                    | $d_{31} = 0.02$<br>$d_{32} = 1.10$<br>$d_{33} = -1.25$  | 161              | 169                          |
| CsB <sub>4</sub> O <sub>6</sub> F <sup>13</sup>               | <i>Pna2<sub>1</sub></i> | 8.00          | 0.114                    | 0.741                                                   | 155              | 172                          |
| CsB <sub>4</sub> O <sub>6</sub> F*                            | <i>Pna2<sub>1</sub></i> | 7.91          | 0.098                    | $d_{15} = -0.07$<br>$d_{32} = 0.95$<br>$d_{33} = -0.95$ | 157              | 177                          |
| KH <sub>2</sub> PO <sub>4</sub> <sup>10,14</sup>              | $\bar{I}4\ 2d$          | 7.26          | 0.034                    | $d_{36} = 0.39$                                         | 171              | 240                          |
| KH <sub>2</sub> PO <sub>4</sub> *                             | $\bar{I}4\ 2d$          | 7.31          | 0.044                    | $d_{36} = 0.35$                                         | 170              | 233                          |

\* This work;

- (1) M. D. Segall, P. J. D. Lindan, M. J. Probert, C. J. Pickard, P. J. Hasnip, S. J. Clark, M. C. Payne, *J. Phys.: Condens. Matter.*, 2002, **14**, 2717-2744.
- (2) Hamann, D. R., Schlüter, M. & Chiang, C. *Phys. Rev. Lett.*, **43**, 1494-1497 (1979).
- (3) J. P. Perdew, K. Burke, M. Ernzerhof, *Phys. Rev. Lett.*, 1996, **77**, 3865-3868.
- (4) A. M. Rappe, K. M. Rabe, E. Kaxiras, J. D. Joannopoulos, *Phys. Rev. B*, **41**, 1990, 1227-1230.
- (5) J. S. Lin, A. Qteish, M. C. Payne, V. Heine, *Phys. Rev. B*, 1993, **47**, 4174-4180.
- (6) H. J. Monkhorst, J. D. Pack, Special points for brillouin-zone integrations., *Phys. Rev. B*, 1976, **13**, 5188-5192.
- (7) C. Aversa, J. E. Sipe, *Phys. Rev. B*, 1995, **52**, 14636-14645.
- (8) J. Lin, M.-H. Lee, Z. P. Liu, C. T. Chen, C. J. Pickard, *Phys. Rev. B*, 1999, **60**, 13380.
- (9) W. L. Jia, J. Y. Fu, Z. Y. Cao, L. Wang, L-W. Wang, *J. Comput. Phys.*, 2013, **251**, 102-115.
- (10) V. G. Dmitriev, G. G. Gurzadyan, D. N. Nikogosyan, *Handbook of Nonlinear Optical Crystals*, Springer, New York, 1995.
- (11) Y. Mori, I. Kuroda, S. Nakajima, T. Sasaki, S. Nnakai, *Appl. Phys. Lett.*, 1993, **67**, 1818.
- (12) G. Shi, Y. Wang, F. Zhang, B. Zhang, Z. Yang, X. Hou, S. Pan, K. Poepplmeier, *J. Am. Chem. Soc.*, 2017, **139**, 10645-10648.
- (13) X. Wang, Y. Wang, B. Zhang, F. Zhang, Z. Yang, S. Pan, *Angew. Chem. Int. Ed.*, 2017, **56**, 14119.
- (14) J. De Yoreo, A. Burnham, P. Whitman, *Int. Mater. Rev.*, 2002, **47**, 113.
